# Supplementary figures and images for: [Retracted] ZOMEC via the p‐Akt/Nrf2 Pathway Restored PTZ‐Induced Oxidative Stress‐Mediated Memory Dysfunction in Mouse Model
Source: Hindawi journal article supplement (doi:10.1155/2022/8902262), 2022-01-01

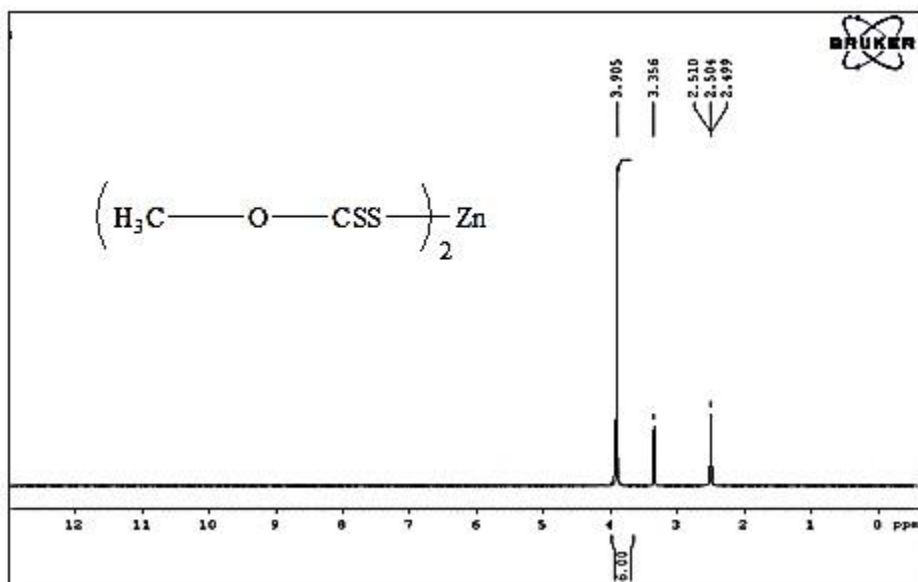

Figure S1.  $^1\text{H-NMR}$  spectrum of ZOMEC (Zinc *ortho*-methyl carbonodithioate)

Supplement: f1 [file 8902262.f1.pdf]
